# Supplementary material for: Risk factors for intensive care admission in children with severe acute asthma in the Netherlands: a prospective multicentre study
Source: PubMed Central journal article supplement — ERJ Open Res. 2020 Aug 17;6(3):00126-2020. doi: 10.1183/23120541.00126-2020 (PMC7430140; doi:10.1183/23120541.00126-2020), 2020-08-17
Supplement: 00126-2020.supp_tables.pdf [file 00126-2020.supp_tables.pdf]

**Supplemental Table S1 – Preschoolers (2 – 4 years)**

|                                            | N  | PICU (n=27)  | N  | Pediatric ward (n=55) | P-value     |
|--------------------------------------------|----|--------------|----|-----------------------|-------------|
| Male gender, n (%)                         | 27 | 10 (37)      | 55 | 33 (60)               | .050        |
| Caucasian, n (%)                           | 27 | 17 (63)      | 55 | 38 (69)               | .570        |
| Asthma diagnoses prior to admission, n (%) | 27 | 20 (74)      | 55 | 37 (67)               | .530        |
| Asthma treated by, n (%) *                 |    |              |    |                       |             |
| General Practitioner                       | 19 | 9 (47)       | 36 | 10 (28)               | <b>.015</b> |
| Pediatrician                               | 19 | 8 (42)       | 36 | 8 (22)                |             |
| Pediatric pulmonologist                    | 19 | 2 (11)       | 36 | 18 (50)               |             |
| Steroid naïve, n (%)                       | 27 | 17 (63)      | 55 | 32 (58)               | .678        |
| Symptoms >1 week prior to admission, n (%) | 27 | 11 (41)      | 54 | 14 (26)               | .174        |
| Adherence ICS † ‡                          |    |              |    |                       |             |
| PDC, mean (±SD)                            | 10 | 83.0 (29)    | 25 | 68.4 (28)             | .172        |
| PDC ≥80%, n (%)                            | 10 | 8 (80)       | 25 | 11 (44)               | .053        |
| Born <37 weeks gestational age, n (%)      | 21 | 2 (10)       | 41 | 6 (15)                | .570        |
| Highest parental education level , n (%)   |    |              |    |                       |             |
| Low                                        | 21 | 1 (5)        | 41 | -                     | .266        |
| Middle                                     | 21 | 9 (43)       | 41 | 14 (34)               |             |
| High                                       | 21 | 11 (52)      | 41 | 27 (66)               |             |
| Status scores postal code, mean (±SD) §    | 27 | -0.38 (1.66) | 55 | -0.44 (1.26)          | .609        |
| Non-PICU admission, n (%)                  | 27 | 16 (59)      | 50 | 36 (72)               | .255        |
| Admission previous year, n (%)             | 27 | 8 (30)       | 55 | 21 (38)               | .447        |
| Ever to PICU, n (%)                        | 27 | 3 (11)       | 55 | 2 (4)                 | .184        |
| ED visit previous year, n (%)              |    |              |    |                       |             |
| None                                       | 21 | 5 (24)       | 41 | 9 (22)                | .986        |
| 1 – 3 times                                | 21 | 13 (62)      | 41 | 26 (63)               |             |
| >3 times                                   | 21 | 3 (14)       | 41 | 6 (15)                |             |
| Parental reported smoking, n (%)           | 26 | 10 (38)      | 53 | 13 (25)               | .270        |
| Cotinine, n (%)                            |    |              |    |                       |             |
| Non-smoker                                 | 20 | 13 (65)      | 43 | 33 (77)               | .328        |
| Passive smoker                             | 20 | 7 (35)       | 43 | 10 (23)               |             |
| Allergic sensitization, n (%)              | 25 | 14 (56)      | 54 | 26 (48)               | .516        |
| Multiple sensitization, n (%) **           | 25 | 3 (12)       | 54 | 2 (4)                 | .159        |
| Respiratory viral infections, n (%)        |    |              |    |                       |             |
| Infection identified                       | 24 | 18 (75)      | 51 | 36 (71)               | .691        |
| Rhinovirus infection                       | 24 | 15 (63)      | 51 | 31 (61)               | .887        |
| Two or more viruses                        | 24 | 3 (13)       | 51 | 8 (15)                | .779        |

\* children with a diagnosis of asthma prior to admission, † of the children with prescribed ICS, ‡ PDC = proportion of days covered in percentages, § The postal code was used to quantify the neighborhood socioeconomic status (SES), with a mean of zero. A lower (negative) score is associated with a lower SES, || Positive RAST = IgE>0.7 kU/L for at least one of the allergens, \*\* Positive RAST for at least 1 pet, pollen, and house dust mite.

**Supplemental Table S2 – School-aged children (5-17 years)**

|                                                       | N  | PICU (n=83)  | N  | Pediatric ward (n=56) | P-value         |
|-------------------------------------------------------|----|--------------|----|-----------------------|-----------------|
| Age in years, mean (±SD)                              | 83 | 9.9 (3.5)    | 56 | 7.5 (2.5)             | <b>&lt;.001</b> |
| Male gender, n (%)                                    | 83 | 58 (70)      | 56 | 36 (64)               | .489            |
| Caucasian, n (%)                                      | 83 | 43 (52)      | 56 | 41 (73)               | <b>.011</b>     |
| Diagnosed with asthma prior to admission <sup>b</sup> | 83 | 64 (77)      | 56 | 42 (75)               | .774            |
| Asthma treated by, n (%) *                            |    |              |    |                       | .510            |
| General Practitioner                                  | 63 | 20 (32)      | 41 | 18 (44)               |                 |
| Pediatrician                                          | 63 | 23 (37)      | 41 | 14 (34)               |                 |
| Pediatric pulmonologist                               | 63 | 20 (32)      | 41 | 9 (22)                |                 |
| Steroid naïve, n (%)                                  | 83 | 39 (47)      | 56 | 35 (63)               | .072            |
| Symptoms >1 week prior to admission, n (%)            | 81 | 49 (61)      | 55 | 11 (20)               | <b>&lt;.001</b> |
| Adherence ICS † ‡                                     |    |              |    |                       |                 |
| PDC, mean (±SD)                                       | 42 | 70.1 (33)    | 18 | 53.9 (31)             | .082            |
| PDC ≥80%, n (%)                                       | 42 | 22 (52)      | 18 | 5 (28)                | .079            |
| Born <37 weeks gestational age, n (%)                 | 63 | 11 (18)      | 43 | 9 (21)                | .654            |
| Highest parental education level , n (%)              |    |              |    |                       | .900            |
| Low                                                   | 61 | 2 (3)        | 43 | 1 (2)                 |                 |
| Middle                                                | 61 | 26 (43)      | 43 | 17 (40)               |                 |
| High                                                  | 61 | 33 (54)      | 43 | 25 (58)               |                 |
| Status scores postal code, mean (±SD) §               | 83 | -0.26 (1.26) | 56 | -0.07 (1.29)          | .286            |
| Non-PICU admission, n (%)                             | 79 | 48 (61)      | 47 | 33 (70)               | .284            |
| Admission previous year, n (%)                        | 81 | 24 (30)      | 56 | 9 (16)                | .068            |
| Ever to PICU, n (%)                                   | 83 | 12 (15)      | 56 | 4 (7)                 | .185            |
| ED visit previous year, n (%)                         |    |              |    |                       | <b>.014</b>     |
| None                                                  | 63 | 33 (52)      | 43 | 12 (28)               |                 |
| 1 – 3 times                                           | 63 | 28 (44)      | 43 | 31 (72)               |                 |
| >3 times                                              | 63 | 2 (3)        | 43 | -                     |                 |
| Parental reported smoking, n (%)                      | 77 | 18 (23)      | 55 | 13 (24)               | .983            |
| Cotinine, n (%)                                       |    |              |    |                       | <b>.017</b>     |
| Non-smoker                                            | 76 | 61 (80)      | 46 | 44 (96)               |                 |
| Passive smoker                                        | 76 | 15 (20)      | 46 | 2 (4)                 |                 |
| Allergic sensitization, n (%)                         | 78 | 65 (83)      | 56 | 45 (80)               | .658            |
| Multiple sensitization, n (%) **                      | 77 | 21 (27)      | 56 | 13 (23)               | .596            |
| Respiratory viral infections, n (%)                   |    |              |    |                       |                 |
| Infection identified                                  | 78 | 38 (49)      | 53 | 29 (55)               | .500            |
| Rhinovirus infection                                  | 78 | 29 (37)      | 53 | 25 (47)               | .254            |
| Two or more viruses                                   | 78 | 4 (5)        | 53 | 6 (11)                | .403            |

\* children with a diagnosis of asthma prior to admission, † of the children with prescribed ICS, ‡ PDC = proportion of days covered in percentages, § The postal code was used to quantify the neighborhood socioeconomic status (SES), with a mean of zero. A lower (negative) score is associated with a lower SES, || Positive RAST = IgE>0.7 kU/L for at least one of the allergens, \*\* Positive RAST for at least 1 pet, pollen, and house dust mite.

**Supplemental Table S3 – Multiple logistic regression for PICU admission children 5-17 years**

| <b>Variable</b>                       | <b>OR</b> | <b>95% CI</b> | <b>P value</b>   |
|---------------------------------------|-----------|---------------|------------------|
| Steroid naïve                         | 0.689     | 0.282-1.683   | 0.414            |
| Age in years *                        | 1.239     | 1.057-1.452   | <b>0.008</b>     |
| Female sex                            | 0.674     | 0.267-1.702   | 0.403            |
| Caucasian                             | 0.471     | 0.194-1.144   | 0.096            |
| Respiratory viral infection           | 1.563     | 0.626-3.901   | 0.338            |
| Symptoms >1 week prior to admission   | 7.005     | 2.675-18.338  | <b>&lt;0.001</b> |
| Previous PICU admissions              | 2.125     | 0.499-9.040   | 0.308            |
| Positive urinary cotinine (>10 ng/ml) | 6.084     | 1.138-32.526  | <b>0.035</b>     |

\* continuous variable
